# Supplementary material for: Time-Resolved Human Kinome RNAi Screen Identifies a Network Regulating Mitotic-Events as Early Regulators of Cell Proliferation
Source: PLoS One. 2011 Jul 13;6(7):e22176. doi: 10.1371/journal.pone.0022176 (PMC3135613; doi:10.1371/journal.pone.0022176)
Supplement: Table S5 — Average normalized CIGR and z-scores obtained after knockdown of 779 kinases (plates 1-10) and 80 cell cycle genes (plate 11) in the RTCA screen. PLK1, WEE1 and COPB2 siRNAs were included as targeting controls, while siAllStars was included as non-targeting control on each plate. The screen was performed in two biological replicates for every siRNA. Raw CI values obtained for every sample at every timepoint were transformed to normalized CIGR values and z-scores were calculated for every siRNA as described in Materials and Methods. (XLS) [file pone.0022176.s016.xls]

## Sheet: CIGR_zscores
Rack	Well	CatalogNumber	GeneSymbol	EntrezGeneID	Accession	avgCIGR_normalized_repl1	avgCIGR_normalized_repl2	zscore
Plate 1	A03	M-005300-00	AAK1	22848	NM_014911	0.536709	0.514171	0.52544
Plate 1	A04	M-005301-01	AATK	9625	XM_375495	-0.783292	-0.616348	-0.69982
Plate 1	A05	M-004061-00	CERK	64781	NM_022766	0.0222663	0.332656	0.177461
Plate 1	A06	M-009511-00	RAPGEF4	11069	NM_007023	3.84248	3.284	3.56324
Plate 1	A07	M-003255-02	CHEK1	1111	NM_001274	-2.49709	-2.56408	-1.5219
Plate 1	A08	M-003256-05	CHEK2	11200	NM_007194	0.0688329	0.0431414	0.0559872
Plate 1	A09	M-006704-00	CHKA	1119	NM_001277	1.33545	1.33634	1.3359
Plate 1	A10	M-006705-00	CHKB	1120	NM_005198	1.0972	1.14702	1.12211
Plate 1	A11	M-005462-01	CHRM1	1128	NM_000738	-0.243283	-0.139822	-0.191552
Plate 1	A12	M-003473-01	CHUK	1147	NM_001278	-1.28742	-1.61769	-1.45255
Plate 1	B03	M-013591-01	CINP	51550	NM_032630	0.484943	0.360065	0.422504
Plate 1	B04	M-004613-00	CIT	11113	NM_007174	0.131948	0.0498578	0.0909031
Plate 1	B05	M-006706-01	CKB	1152	NM_001823	-0.402032	-0.743529	-0.57278
Plate 1	B06	M-006707-00	CKM	1158	NM_001824	-0.193245	-0.73746	-0.465352
Plate 1	B07	M-006708-00	CKMT1	1159	NM_020990	-0.346128	-0.581341	-0.463734
Plate 1	B08	M-006709-00	CKMT2	1160	NM_001825	-0.538156	-0.116914	-0.327535
Plate 1	B09	M-004586-01	CKS1B	1163	NM_001826	0.220432	0.0887604	0.154596
Plate 1	B10	M-007678-00	CKS2	1164	NM_001827	1.59237	2.13323	1.8628
Plate 1	B11	M-004800-00	CLK1	1195	NM_004071	-1.13271	-0.487735	-0.810222
Plate 1	B12	M-004801-01	CLK2	1196	NM_001291	-1.75923	-1.85491	-1.80707
Plate 1	C03	M-004802-01	CLK3	1198	NM_001292	0.406031	0.0333152	0.219673
Plate 1	C04	M-004803-00	CLK4	57396	NM_020666	0.00871071	-0.0495424	-0.0204158
Plate 1	C05	M-003100-01	ABL1	25	NM_007313	0.232764	0.0446096	0.138687
Plate 1	C06	M-003101-01	ABL2	27	NM_005158	-2.14896	-2.48653	-2.31774
Plate 1	C07	M-003102-02	ACK1	10188	NM_005781	-0.624125	-0.396513	-0.510319
Plate 1	C08	M-004924-01	ACVR1	90	NM_001105	0.495659	0.367732	0.431696
Plate 1	C09	M-004925-01	ACVR1B	91	NM_004302	0.546381	0.463892	0.505137
Plate 1	C10	M-004926-01	ACVR2	92	NM_001616	-0.22346	-0.945009	-0.584235
Plate 1	C11	M-004927-00	ACVR2B	93	NM_001106	0.105447	0.119097	0.112272
Plate 1	C12	M-005302-02	ACVRL1	94	NM_000020	0.834572	0.855848	0.84521
Plate 1	D03	M-004504-02	ADAM9	8754	NM_003816	0.0107521	-0.193936	-0.0915918
Plate 1	D04	M-005303-02	ADCK1	57143	NM_020421	-0.654391	-0.728049	-0.69122
Plate 1	D05	M-005304-01	ADCK2	90956	NM_052853	-1.00705	-1.20245	-1.10475
Plate 1	D06	M-005305-01	ADCK4	79934	NM_024876	1.90931	1.64801	1.77866
Plate 1	D07	M-018919-00	ADCK5	203054	NM_174922	-1.22461	-1.00577	-1.11519
Plate 1	D08	M-004733-02	ADK	132	NM_001123	0.50079	1.16218	0.831483
Plate 1	D09	M-005419-00	ADRA1A	148	NM_000680	1.35825	1.56763	1.46294
Plate 1	D10	M-005420-01	ADRA1B	147	NM_000679	1.31541	1.66259	1.489
Plate 1	D11	M-005426-01	ADRB2	154	NM_000024	1.07796	0.742379	0.910171
Plate 1	D12	M-004325-01	ADRBK1	156	NM_001619	-0.82131	-1.08441	-0.952861
Plate 1	E03	M-004326-00	ADRBK2	157	NM_005160	-0.480291	1.24599	0.38285
Plate 1	E04	M-005429-01	AGTR2	186	NM_000686	1.29295	1.20181	1.24738
Plate 1	E05	M-006811-02	AK1	203	NM_000476	1.11045	-0.427251	0.341599
Plate 1	E06	M-006812-00	AK2	204	NM_001625	-0.399328	0.353991	-0.0226687
Plate 1	E07	M-006700-01	AK3	205	NM_013410	0.387373	-0.0727343	0.157319
Plate 1	E08	M-006701-00	AK3L1	50808	NM_016282	0.00936245	-0.276743	-0.13369
Plate 1	E09	M-004897-02	AK5	26289	NM_012093	-0.251695	-0.918364	-0.585029
Plate 1	E10	M-007257-00	AK7	122481	NM_152327	-1.03201	0.482084	-0.274961
Plate 1	E11	M-011426-01	AKAP1	8165	NM_003488	0.420445	-1.04069	-0.31012
Plate 1	E12	M-009277-01	AKAP11	11215	NM_016248	-1.09113	-1.45776	-1.27444
Plate 1	F03	M-008868-01	AKAP13	11214	NM_006738	-0.146403	-0.0429275	-0.094665
Plate 1	F04	M-009765-01	AKAP3	10566	NM_006422	-0.292347	-1.61293	-0.952638
Plate 1	F05	M-008442-00	AKAP4	8852	NM_003886	-1.74341	1.06142	-0.340996
Plate 1	F06	M-011954-00	AKAP5	9495	NM_004857	1.28804	0.020582	0.654313
Plate 1	F07	M-008497-01	AKAP6	9472	NM_004274	0.0731523	-0.0961038	-0.0114758
Plate 1	F08	M-013371-00	AKAP7	9465	NM_004842	-0.763374	1.30628	0.271451
Plate 1	F09	M-009656-01	AKAP8	10270	NM_005858	1.39018	-0.605936	0.392121
Plate 1	F10	M-003000-01	AKT1	207	NM_005163	-0.719903	-0.65772	-0.688812
Plate 1	F11	M-003001-01	AKT2	208	NM_001626	0.351012	-0.18365	0.083681
Plate 1	F12	M-003002-01	AKT3	10000	NM_005465	-0.313912	-0.0150891	-0.1645
Plate 1	G03	M-003103-02	ALK	238	NM_004304	-0.116645	0.2732	0.0782774
Plate 1	G04	M-004929-01	ACVR1C	130399	NM_145259	0.223799	-0.809079	-0.29264
Plate 1	G05	M-005306-01	ALS2CR2	55437	NM_018571	-0.991384	-0.457289	-0.724336
Plate 1	G06	M-004685-01	ALS2CR7	65061	NM_139158	-0.175663	0.952817	0.388577
Plate 1	G07	M-005307-01	AMHR2	269	NM_020547	1.38083	-0.0182322	0.6813
Plate 1	G08	M-007803-00	ANGPT4	51378	NM_015985	-0.136988	-0.124424	-0.130706
Plate 1	G09	M-004930-01	ANKK1	255239	NM_178510	0.0915782	-0.233773	-0.0710973
Plate 1	G10	M-005308-02	ANKRD3	54101	NM_020639	0.202652	-0.0148758	0.0938883
Plate 1	G11	M-007687-01	APEG1	10290	NM_005876	0.0257955	-0.234646	-0.104425
Plate 1	G12	M-005138-00	APPL	26060	NM_012096	-0.16558	1.92672	0.880568
Plate 1	H03	M-003563-02	ARAF1	369	NM_001654	-1.29122	-0.268221	-0.779718
Plate 1	H04	M-004931-00	ARK5	9891	NM_014840	0.22303	0.13488	0.178955
Plate 1	H05	M-004165-01	ASK	10926	NM_006716	-0.120799	-0.0943829	-0.107591
Plate 1	H06	M-013023-00	ASP	83853	NM_031916	0.0435367	0.191401	0.117469
Plate 1	H07	M-003201-02	ATM	472	NM_138293	0.40151	-1.06745	-0.33297
Plate 1	H08	M-003202-04	ATR	545	NM_001184	-2.1428	0.819043	-0.661879
Plate 1	H09	M-003326-02	AURKB	9212	NM_004217	0.547243	0.0329978	0.290121
Plate 1	H10	M-019573-01	AURKC	6795	NM_003160	-0.030396	1.03629	0.502946
Plate 1	H11	M-003631-01	AVPR1A	552	NM_000706	1.26152	-0.50244	0.379539
Plate 1	H12	M-005431-00	AVPR1B	553	NM_000707	-0.567394	-0.211284	-0.389339
Plate 2	A03	M-003104-02	AXL	558	NM_001699	0.0269259	-0.358064	-0.296127
Plate 2	A04	M-008914-00	AZU1	566	NM_001700	-1.50945	-1.3084	-1.52875
Plate 2	A05	M-004932-00	BCKDK	10295	NM_005881	-1.23938	-1.6391	-1.49287
Plate 2	A06	M-003875-04	BCR	613	NM_004327	1.4036	1.0795	1.2683
Plate 2	A07	M-005436-00	BDKRB2	624	NM_000623	0.089268	-0.181139	-0.160513
Plate 2	A08	M-003105-03	BLK	640	NM_001715	1.21781	0.34764	0.553011
Plate 2	A09	M-020353-01	BLNK	29760	NM_013314	-1.01385	-1.24323	-1.18023
Plate 2	A10	M-005071-00	BMP2K	55589	NM_017593	-0.409567	0.197678	-0.157208
Plate 2	A11	M-004933-03	BMPR1A	657	NM_004329	-0.73955	-0.175579	-0.546843
Plate 2	A12	M-004934-01	BMPR1B	658	NM_001203	-0.836832	-0.656277	-0.780316
Plate 2	B03	M-005309-02	BMPR2	659	NM_001204	-0.547213	-0.787211	-0.855897
Plate 2	B04	M-003106-02	BMX	660	NM_001721	-0.961804	-1.2618	-1.08492
Plate 2	B05	M-003460-01	BRAF	673	NM_004333	0.62472	0.310642	0.631306
Plate 2	B06	M-004935-01	BRD2	6046	NM_005104	-0.329357	-0.539586	-0.475588
Plate 2	B07	M-004938-01	BRDT	676	NM_001726	0.0662944	-0.182746	-0.0209792
Plate 2	B08	M-003107-01	BTK	695	NM_000061	0.0254772	-0.224353	-0.225516
Plate 2	B09	M-004102-00	BUB1	699	NM_004336	-0.674441	-1.10588	-0.654434
Plate 2	B10	M-004101-00	BUB1B	701	NM_001211	0.340969	-0.0507353	0.223455
Plate 2	B11	M-005310-00	C14ORF20	283629	NM_174944	-1.06315	-0.431086	-0.602873
Plate 2	B12	M-003108-01	TP53RK	112858	NM_033550	-0.662887	-0.425289	-0.4433
Plate 2	C03	M-003754-01	TRIB3	57761	NM_021158	0.766551	0.963105	0.679821
Plate 2	C04	M-007254-01	C6ORF199	221264	NM_145025	0.902024	1.71334	1.30071
Plate 2	C05	M-018324-01	C7ORF16	10842	NM_006658	-0.238846	-0.305399	-0.153927
Plate 2	C06	M-003633-01	TRIB1	10221	NM_025195	0.217588	0.0226341	0.0858225
Plate 2	C07	M-006703-02	C9ORF12	64768	NM_022755	1.37748	1.63134	1.47574
Plate 2	C08	M-019939-01	CALM3	808	NM_005184	-1.25411	-1.01403	-1.11574
Plate 2	C09	M-004940-00	CAMK1	8536	NM_003656	-0.912308	-1.16114	-0.944321
Plate 2	C10	M-004946-00	CAMK1D	57118	NM_020397	-0.126705	-0.106479	-0.00899102
Plate 2	C11	M-004941-01	CAMK1G	57172	NM_020439	-0.969585	-0.621822	-0.546059
Plate 2	C12	M-004942-00	CAMK2A	815	NM_015981	1.06109	1.72338	1.15928
Plate 2	D03	M-004943-03	CAMK2B	816	NM_001220	0.0666969	0.308735	0.0874799
Plate 2	D04	M-004042-02	CAMK2D	817	NM_001221	0.959422	0.867833	0.805329
Plate 2	D05	M-004536-01	CAMK2G	818	NM_001222	0.388453	0.579051	0.367014
Plate 2	D06	M-004944-01	CAMK4	814	NM_001744	-0.649117	-0.668606	-0.62002
Plate 2	D07	M-004912-00	CAMKK1	84254	NM_172207	0.572982	-0.566191	-0.263434
Plate 2	D08	M-004842-01	CAMKK2	10645	NM_006549	-0.707162	-1.06417	-0.949435
Plate 2	D09	M-004395-00	CARD10	29775	NM_014550	0.12629	-0.863109	-0.0193921
Plate 2	D10	M-004397-00	CARD14	79092	NM_024110	1.51093	0.210104	0.709873
Plate 2	D11	M-005013-01	TNNI3K	51086	NM_015978	0.971688	0.449946	0.772187
Plate 2	D12	M-006815-00	CARKL	23729	NM_013276	-0.447494	0.67384	-0.0885763
Plate 2	E03	M-005311-01	CASK	8573	NM_003688	-0.606329	-0.672679	-0.714891
Plate 2	E04	M-007831-00	CCL2	6347	NM_002982	-0.232503	-0.386232	-0.311324
Plate 2	E05	M-007843-01	CCL4	6351	NM_002984	1.47537	1.97922	2.22479
Plate 2	E06	M-004686-01	CCRK	23552	NM_012119	-0.198618	-0.225114	-0.275902
Plate 2	E07	M-003775-01	CD3E	916	NM_000733	1.37078	1.03024	1.33855
Plate 2	E08	M-005234-01	CD4	920	NM_000616	-2.13262	-1.92595	-1.88766
Plate 2	E09	M-013630-02	CD7	924	NM_006137	0.256787	0.172249	0.252602
Plate 2	E10	M-007732-00	CDADC1	81602	NM_030911	-0.401568	-0.315184	-0.200598
Plate 2	E11	M-003224-03	CDC2	983	NM_001786	0.524553	0.375985	0.168556
Plate 2	E12	M-004687-01	CDC2L1	984	NM_001787	-1.04783	-0.358249	-0.689415
Plate 2	F03	M-004026-01	CDC2L2	985	NM_024011	0.510472	0.00381625	0.384498
Plate 2	F04	M-004688-00	CDC2L5	8621	NM_003718	4.02876	3.40188	3.35931
Plate 2	F05	M-003814-02	CDC42BPA	8476	NM_003607	-0.572887	-1.22937	-0.721467
Plate 2	F06	M-004075-01	CDC42BPB	9578	NM_006035	1.13925	0.972792	0.818536
Plate 2	F07	M-003234-02	CDC7	8317	NM_003503	0.0414485	0.185538	-0.0349567
Plate 2	F08	M-003235-04	CDK10	8558	NM_003674	0.330029	-0.338996	-0.210502
Plate 2	F09	M-004689-00	CDK11	23097	NM_015076	-1.91959	-1.83731	-1.84551
Plate 2	F10	M-003236-04	CDK2	1017	NM_001798	-0.532792	0.433809	0.0149925
Plate 2	F11	M-003237-01	CDK3	1018	NM_001258	0.517783	0.88365	0.577524
Plate 2	F12	M-003238-02	CDK4	1019	NM_000075	0.509977	0.479	-0.0205033
Plate 2	G03	M-003239-01	CDK5	1020	NM_004935	-0.925236	-0.799015	-0.791995
Plate 2	G04	M-008988-00	CDK5R1	8851	NM_003885	1.66737	1.561	1.2737
Plate 2	G05	M-008885-00	CDK5R2	8941	NM_003936	1.78856	1.57042	1.99017
Plate 2	G06	M-013297-01	CDK5RAP1	51654	NM_016082	0.843369	0.854115	0.895004
Plate 2	G07	M-012957-00	CDK5RAP3	80279	NM_025197	-0.79822	-0.92171	-0.906837
Plate 2	G08	M-003240-02	CDK6	1021	NM_001259	-0.305515	0.0620577	-0.5331
Plate 2	G09	M-003241-01	CDK7	1022	NM_001799	0.432209	0.510864	0.47962
Plate 2	G10	M-003242-02	CDK8	1024	NM_001260	0.269301	0.313729	0.366434
Plate 2	G11	M-003243-02	CDK9	1025	NM_001261	-0.604692	-0.343435	-0.318093
Plate 2	G12	M-004323-01	CDKL1	8814	NM_004196	-1.14018	-1.07068	-1.13749
Plate 2	H03	M-004797-00	CDKL2	8999	NM_003948	0.346117	0.63272	0.464942
Plate 2	H04	M-004798-00	CDKL3	51265	NM_016508	0.214508	0.562996	0.377846
Plate 2	H05	M-004799-02	CDKL5	6792	NM_003159	1.09654	1.90248	1.56381
Plate 2	H06	M-003471-00	CDKN1A	1026	NM_000389	0.00883633	0.428551	0.316745
Plate 2	H07	M-003472-00	CDKN1B	1027	NM_004064	-0.389324	-0.489193	-0.39638
Plate 2	H08	M-003244-03	CDKN1C	1028	NM_000076	0.892318	1.87415	1.1
Plate 2	H09	M-003245-02	CDKN2B	1030	NM_004936	0.141587	-0.00730768	-0.0924168
Plate 2	H10	M-003246-01	CDKN2C	1031	NM_001262	-0.805567	-0.604386	-0.614231
Plate 2	H11	M-003247-02	CDKN2D	1032	NM_001800	-1.56265	-1.14566	-1.03723
Plate 2	H12	M-003879-00	CDKN3	1033	NM_005192	-1.65327	-1.65814	-1.66237
Plate 3	A03	M-003257-02	PLK3	1263	NM_004073	0.858194	0.939396	0.808475
Plate 3	A04	M-012217-00	CNKSR1	10256	NM_006314	-1.19943	-1.72115	-1.41088
Plate 3	A05	M-012101-00	COL4A3BP	10087	NM_005713	0.254402	0.0638918	0.117551
Plate 3	A06	M-019847-01	COPB2	9276	NM_004766	-2.59485	-2.50963	-2.566
Plate 3	A07	M-004031-02	CRK7	51755	NM_016507	1.26375	1.00958	1.00267
Plate 3	A08	M-012023-01	CRKL	1399	NM_005207	-1.33193	-0.735329	-0.954506
Plate 3	A09	M-003109-02	CSF1R	1436	NM_005211	1.07937	1.31883	1.14062
Plate 3	A10	M-003110-02	CSK	1445	NM_004383	0.422313	1.09976	0.707552
Plate 3	A11	M-003957-03	CSNK1A1	1452	NM_001892	0.510635	0.176721	0.274334
Plate 3	A12	M-003478-00	CSNK1D	1453	NM_001893	-0.387311	-0.197372	-0.356073
Plate 3	B03	M-003479-01	CSNK1E	1454	NM_001894	1.41251	0.938302	1.06196
Plate 3	B04	M-004666-01	CSNK1G1	53944	NM_022048	0.406824	0.423055	0.467213
Plate 3	B05	M-004678-00	CSNK1G2	1455	NM_001319	-1.26493	-1.37279	-1.29731
Plate 3	B06	M-004679-02	CSNK1G3	1456	NM_004384	-0.0675063	0.161427	0.0470869
Plate 3	B07	M-003475-00	CSNK2A1	1457	NM_001895	-0.267246	-0.0656278	-0.237635
Plate 3	B08	M-004752-00	CSNK2A2	1459	NM_001896	-1.34545	-1.64352	-1.55417
Plate 3	B09	M-007679-00	CSNK2B	1460	NM_001320	-1.21709	-1.2906	-1.20983
Plate 3	B10	M-007871-00	CXCL10	3627	NM_001565	1.8002	2.86235	2.51678
Plate 3	B11	M-004417-02	DAPK1	1612	NM_004938	0.221163	-0.1017	0.249218
Plate 3	B12	M-004418-02	DAPK2	23604	NM_014326	-0.285504	-0.271281	-0.40512
Plate 3	C03	M-004947-00	DAPK3	1613	NM_001348	0.943366	0.689438	1.13098
Plate 3	C04	M-004884-01	DCAMKL1	9201	NM_004734	1.74428	1.17108	1.61014
Plate 3	C05	M-006710-00	DCK	1633	NM_000788	-0.355702	-0.485789	-0.328911
Plate 3	C06	M-003111-03	DDR1	780	NM_001954	-0.514301	-0.0218425	-0.0744898
Plate 3	C07	M-003112-03	DDR2	4921	NM_006182	-0.824436	-1.38235	-1.06363
Plate 3	C08	M-006711-02	DGKA	1606	NM_001345	0.621654	0.216956	0.212519
Plate 3	C09	M-006712-01	DGKB	1607	NM_004080	0.257332	0.145436	3.40707e-05
Plate 3	C10	M-006713-03	DGKD	8527	NM_003648	-0.183918	-0.177915	-0.12859
Plate 3	C11	M-011493-00	DGKE	8526	NM_003647	-0.621408	-0.335896	-0.438471
Plate 3	C12	M-006715-00	DGKG	1608	NM_001346	-0.416497	-0.0960929	-0.339613
Plate 3	D03	M-006717-01	DGKI	9162	NM_004717	-0.662032	-1.16708	-0.566326
Plate 3	D04	M-005079-02	DGKQ	1609	NM_001347	-1.01193	-1.13178	-1.03322
Plate 3	D05	M-006718-00	DGKZ	8525	NM_003646	-0.57869	0.117101	-0.0411794
Plate 3	D06	M-006719-02	DGUOK	1716	NM_001929	1.09779	0.486764	1.01065
Plate 3	D07	M-004949-00	DKFZP434C131	25989	XM_044630	-0.177423	-0.846724	-0.0440441
Plate 3	D08	M-005313-01	DKFZp434C1418	285220	NM_173655	-0.682889	-0.968194	-0.767904
Plate 3	D09	M-006808-00	DKFZP586B1621	26007	NM_015533	-1.09164	-1.08477	-1.02785
Plate 3	D10	M-025870-00	DKFZP761P0423	157285	XM_291277	0.315089	0.569101	0.34629
Plate 3	D11	M-003113-01	STYK1	55359	NM_018423	-1.36843	-1.40338	-1.41188
Plate 3	D12	M-009415-00	DLG1	1739	NM_004087	-0.471313	-0.443029	-0.620303
Plate 3	E03	M-011252-01	DLG2	1740	NM_001364	-0.216987	-0.374901	-0.310679
Plate 3	E04	M-009462-01	DLG3	1741	NM_021120	0.0561563	-0.246767	0.272332
Plate 3	E05	M-007882-01	DLG4	1742	NM_001365	1.28771	1.16237	1.08968
Plate 3	E06	M-004637-00	DMPK	1760	NM_004409	-0.512506	-0.465329	-0.535866
Plate 3	E07	M-012251-00	DNAJC3	5611	NM_006260	1.29822	0.782857	0.913014
Plate 3	E08	M-011254-00	DOK1	1796	NM_001381	-0.906942	-0.735402	-0.899715
Plate 3	E09	M-006720-00	DTYMK	1841	NM_012145	2.54301	1.72068	2.16376
Plate 3	E10	M-003484-02	DUSP1	1843	NM_004417	-0.804475	-0.906237	-0.912201
Plate 3	E11	M-003965-01	DUSP10	11221	NM_007207	0.0517732	0.217885	0.0717307
Plate 3	E12	M-003565-01	DUSP2	1844	NM_004418	-0.186191	-0.396062	-0.529465
Plate 3	F03	M-004517-00	DUSP22	56940	NM_020185	-0.165856	-0.678449	-0.338005
Plate 3	F04	M-003963-02	DUSP4	1846	NM_001394	-1.06248	-1.38532	-1.1546
Plate 3	F05	M-003566-01	DUSP5	1847	NM_004419	-0.0436391	-0.104426	0.0518252
Plate 3	F06	M-003964-01	DUSP6	1848	NM_001946	-0.15966	-0.570106	-0.295088
Plate 3	F07	M-003567-00	DUSP7	1849	XM_037430	-0.371299	0.296591	0.132478
Plate 3	F08	M-003568-00	DUSP8	1850	NM_004420	1.21999	1.11627	0.944224
Plate 3	F09	M-004805-00	DYRK1A	1859	NM_001396	-0.765994	-0.703526	-0.718891
Plate 3	F10	M-004806-01	DYRK1B	9149	NM_004714	0.559735	0.525866	0.493257
Plate 3	F11	M-004730-02	DYRK2	8445	NM_003583	0.803707	1.36641	0.786654
Plate 3	F12	M-004731-00	DYRK3	8444	NM_003582	-0.664612	-0.370023	-0.504702
Plate 3	G03	M-004732-01	DYRK4	8798	NM_003845	0.641079	0.830289	0.405633
Plate 3	G04	M-017723-01	EDN2	1907	NM_001956	1.22197	1.16761	0.987209
Plate 3	G05	M-004950-00	EEF2K	29904	NM_013302	-0.742326	-0.72052	-0.677719
Plate 3	G06	M-003114-01	EGFR	1956	NM_005228	2.18995	1.52328	1.78261
Plate 3	G07	M-004883-01	EIF2AK3	9451	NM_004836	-0.670354	-0.465344	-0.51818
Plate 3	G08	M-005314-00	EIF2AK4	27104	XM_031612	0.0255316	-0.196122	-0.0628086
Plate 3	G09	M-006721-01	EKI1	55500	NM_018638	0.505022	0.367648	0.334498
Plate 3	G10	M-007676-00	RAPGEF3	10411	NM_006105	-1.78852	-1.45185	-1.74195
Plate 3	G11	M-003115-02	EPHA1	2041	NM_005232	1.09521	1.18866	1.03746
Plate 3	G12	M-003116-01	EPHA2	1969	NM_004431	0.406884	0.558183	0.307935
Plate 3	H03	M-003117-02	EPHA3	2042	NM_005233	1.02915	1.6599	1.36232
Plate 3	H04	M-003118-01	EPHA4	2043	NM_004438	2.05452	2.47426	2.28538
Plate 3	H05	M-005315-02	EPHA5	2044	NM_004439	1.11957	0.830715	1.0213
Plate 3	H06	M-003119-01	EPHA7	2045	NM_004440	-0.0782658	0.0210924	0.0563986
Plate 3	H07	M-003120-02	EPHA8	2046	NM_020526	0.950174	1.0729	1.01283
Plate 3	H08	M-003121-01	EPHB1	2047	NM_004441	-0.773321	-0.430305	-0.593431
Plate 3	H09	M-003122-01	EPHB2	2048	NM_004442	-0.456575	0.107802	-0.220502
Plate 3	H10	M-003123-02	EPHB3	2049	NM_004443	-0.999148	-0.520831	-0.710634
Plate 3	H11	M-003124-01	EPHB4	2050	NM_004444	-0.177194	0.252937	-0.0321725
Plate 3	H12	M-003125-01	EPHB6	2051	NM_004445	-1.80004	-1.45804	-1.63216
Plate 4	A03	M-003126-01	ERBB2	2064	NM_004448	0.904705	0.582608	0.743656
Plate 4	A04	M-003127-02	ERBB3	2065	NM_001982	-0.0176711	-0.0784745	-0.0480728
Plate 4	A05	M-003128-02	ERBB4	2066	NM_005235	0.164358	0.394735	0.279547
Plate 4	A06	M-004807-01	ERK8	225689	NM_139021	-2.81248	-2.14627	-2.47937
Plate 4	A07	M-004951-01	ERN1	2081	NM_001433	0.530185	0.438325	0.484255
Plate 4	A08	M-006530-01	EVI1	2122	NM_005241	-0.0255973	0.164003	0.0692029
Plate 4	A09	M-005317-02	FASTK	10922	NM_006712	2.13176	4.13978	3.13577
Plate 4	A10	M-003129-01	FER	2241	NM_005246	0.299053	0.871909	0.585481
Plate 4	A11	M-003130-01	FES	2242	NM_002005	0.122267	0.0698917	0.0960796
Plate 4	A12	M-003131-02	FGFR1	2260	NM_000604	-0.579385	-0.603857	-0.591621
Plate 4	B03	M-003132-01	FGFR2	2263	NM_000141	1.01625	0.928648	0.97245
Plate 4	B04	M-003133-01	FGFR3	2261	NM_000142	0.392891	0.437391	0.415141
Plate 4	B05	M-003134-01	FGFR4	2264	NM_002011	-1.02745	-1.79477	-1.41111
Plate 4	B06	M-003135-02	FGR	2268	NM_005248	-0.264234	-0.360933	-0.312583
Plate 4	B07	M-005318-00	FLJ10074	55681	NM_017988	0.237143	-0.0578774	0.0896329
Plate 4	B08	M-005078-00	FLJ10761	55224	NM_018208	-1.03058	-0.967562	-0.999072
Plate 4	B09	M-007256-00	FLJ10842	55750	NM_018238	-1.14352	-0.0548446	-0.59918
Plate 4	B10	M-007260-00	RFK	55312	NM_018339	0.105185	0.339246	0.222215
Plate 4	B11	M-007726-00	FLJ12476	64799	NM_022784	-0.722205	-0.55539	-0.638798
Plate 4	B12	M-006318-00	FLJ13052	65220	NM_023018	-0.778962	-0.820809	-0.799885
Plate 4	C03	M-004020-03	MASTL	84930	NM_032844	0.737318	0.254534	0.495926
Plate 4	C04	M-005319-01	FLJ20574	54986	NM_017886	0.581352	0.14592	0.363636
Plate 4	C05	M-007253-00	THNSL1	79896	NM_024838	0.507087	0.757824	0.632455
Plate 4	C06	M-004843-00	FLJ23074	80122	NM_025052	0.469281	-0.0579813	0.20565
Plate 4	C07	M-005320-01	LRRK1	79705	NM_024652	2.36334	1.59575	1.97955
Plate 4	C08	M-005321-00	FLJ23356	84197	NM_032237	-0.192119	-0.530156	-0.361138
Plate 4	C09	M-004624-00	FLJ25006	124923	NM_144610	-0.866686	-0.795743	-0.831215
Plate 4	C10	M-004052-02	FLJ32685	152110	NM_152534	-0.226416	-0.394384	-0.3104
Plate 4	C11	M-006803-00	C9ORF98	158067	NM_152572	1.94218	1.91509	1.92863
Plate 4	C12	M-005326-00	FLJ34389	197259	NM_152649	-0.350694	-0.359875	-0.355285
Plate 4	D03	M-007727-00	FLJ35107	348825	XM_496631	1.35418	0.460198	0.907187
Plate 4	D04	M-003136-02	FLT1	2321	NM_002019	0.48956	-0.119322	0.185119
Plate 4	D05	M-003137-01	FLT3	2322	NM_004119	-0.613484	0.0163942	-0.298545
Plate 4	D06	M-003138-01	FLT4	2324	NM_002020	-0.752995	-0.552087	-0.652541
Plate 4	D07	M-006724-00	FN3K	64122	NM_022158	-0.759202	-1.23949	-0.999347
Plate 4	D08	M-006817-00	FN3KRP	79672	NM_024619	-0.265967	-0.888619	-0.577293
Plate 4	D09	M-003008-01	FRAP1	2475	NM_004958	-0.432568	-0.165233	-0.298901
Plate 4	D10	M-006691-00	FRDA	2395	NM_000144	-0.251955	-0.184216	-0.218085
Plate 4	D11	M-003139-01	FRK	2444	NM_002031	0.548554	0.87352	0.711037
Plate 4	D12	M-007255-00	FUK	197258	NM_145059	-1.3369	-1.43397	-1.38544
Plate 4	E03	M-020174-01	FYB	2533	NM_001465	0.234835	0.120578	0.177707
Plate 4	E04	M-003140-03	FYN	2534	NM_002037	1.5783	1.3553	1.4668
Plate 4	E05	M-005005-01	GAK	2580	NM_005255	0.709839	-0.0169573	0.346441
Plate 4	E06	M-007728-01	GALK1	2584	NM_000154	-0.718709	-0.619685	-0.669197
Plate 4	E07	M-006725-00	GALK2	2585	NM_002044	0.364831	0.496436	0.430634
Plate 4	E08	M-011663-00	GAP43	2596	NM_002045	-0.990286	-0.875359	-0.932822
Plate 4	E09	M-010819-01	GCK	2645	NM_000162	1.86399	2.633	2.24849
Plate 4	E10	M-007914-00	GFRA2	2675	NM_001495	0.821913	0.824382	0.823148
Plate 4	E11	M-006727-00	GK	2710	NM_000167	0.504754	0.371115	0.437935
Plate 4	E12	M-015091-01	GK2	2712	NM_033214	0.652669	1.13901	0.895838
Plate 4	F03	M-019100-00	GMFB	2764	NM_004124	-0.0794957	-0.390554	-0.235025
Plate 4	F04	M-019878-01	GMFG	9535	NM_004877	-0.99766	-1.20447	-1.10106
Plate 4	F05	M-006729-00	GNE	10020	NM_005476	0.486999	0.32536	0.40618
Plate 4	F06	M-004625-00	GRK4	2868	NM_005307	-1.16092	-1.07599	-1.11846
Plate 4	F07	M-004626-00	GRK5	2869	NM_005308	0.292755	0.539976	0.416366
Plate 4	F08	M-004627-01	GRK6	2870	NM_002082	-0.0180785	0.187843	0.0848821
Plate 4	F09	M-004628-00	GRK7	131890	NM_139209	-0.952274	-1.14852	-1.0504
Plate 4	F10	M-005327-00	GSG2	83903	NM_031965	-0.24045	-0.211611	-0.22603
Plate 4	F11	M-003009-01	GSK3A	2931	NM_019884	-2.02117	-1.97814	-1.99966
Plate 4	F12	M-003010-03	GSK3B	2932	NM_002093	-1.5349	-1.08337	-1.30914
Plate 4	G03	M-010924-00	GTF2H1	2965	NM_005316	0.21977	0.141597	0.180684
Plate 4	G04	M-005328-00	GUCY2C	2984	NM_004963	-1.98572	-1.7425	-1.86411
Plate 4	G05	M-005329-01	GUCY2D	3000	NM_000180	-0.456419	-0.902756	-0.679587
Plate 4	G06	M-004515-01	GUCY2F	2986	NM_001522	0.952625	0.826385	0.889505
Plate 4	G07	M-006734-01	GUK1	2987	NM_000858	0.403847	0.70037	0.552109
Plate 4	G08	M-005006-00	HSPB8	26353	NM_014365	-0.0763974	-0.269353	-0.172875
Plate 4	G09	M-005330-02	HAK	115701	NM_052947	-0.421334	-0.489044	-0.455189
Plate 4	G10	M-003141-02	HCK	3055	NM_002110	-0.0684686	-0.126864	-0.0976661
Plate 4	G11	M-004809-02	HIPK1	204851	NM_152696	-0.945592	-0.835272	-0.890432
Plate 4	G12	M-003266-03	HIPK2	28996	NM_022740	-0.670412	-0.106608	-0.38851
Plate 4	H03	M-004810-00	HIPK3	10114	NM_005734	1.5574	1.59424	1.57582
Plate 4	H04	M-004808-02	HIPK4	147746	NM_144685	0.615561	0.65448	0.63502
Plate 4	H05	M-006820-01	HK1	3098	NM_000188	0.0810587	0.146704	0.113881
Plate 4	H06	M-006735-01	HK2	3099	NM_000189	-2.20993	-1.11399	-1.66196
Plate 4	H07	M-006736-00	HK3	3101	NM_002115	0.74089	0.286424	0.513657
Plate 4	H08	M-005007-00	HRI	27102	NM_014413	0.440046	0.254255	0.347151
Plate 4	H09	M-004618-00	STK32B	55351	NM_018401	1.74149	1.30849	1.52499
Plate 4	H10	M-007691-01	HSMDPKIN	55561	XM_290516	0.14751	-0.527701	-0.190095
Plate 4	H11	M-004214-01	HUNK	30811	NM_014586	1.62954	0.833452	1.2315
Plate 4	H12	M-011927-00	ITGB1BP1	9270	NM_004763	-0.937998	-0.244534	-0.591266
Plate 5	A03	M-004811-01	ICK	22858	NM_014920	0.466142	0.151291	0.308717
Plate 5	A04	M-003012-04	IGF1R	3480	NM_000875	0.505194	-0.136194	0.1845
Plate 5	A05	M-006737-01	IHPK1	9807	NM_153273	1.32114	1.20957	1.26535
Plate 5	A06	M-006738-00	IHPK2	51447	NM_016291	0.397458	0.559574	0.478516
Plate 5	A07	M-006739-00	IHPK3	117283	NM_054111	-1.11073	-1.11552	-1.11312
Plate 5	A08	M-009371-00	IKBKAP	8518	NM_003640	0.674585	0.2922	0.483393
Plate 5	A09	M-003503-00	IKBKB	3551	XM_032491	1.33311	0.828923	1.08102
Plate 5	A10	M-003723-02	IKBKE	9641	NM_014002	-0.732225	-0.206686	-0.469456
Plate 5	A11	M-007967-00	IL2	3558	NM_000586	0.246936	0.336533	0.291734
Plate 5	A12	M-004499-00	ILK	3611	NM_004517	-0.881257	-0.838862	-0.860059
Plate 5	B03	M-010260-00	ILKAP	80895	NM_030768	1.54656	0.972243	1.2594
Plate 5	B04	M-006740-01	IMPK	253430	NM_152230	0.726747	0.484096	0.605422
Plate 5	B05	M-003014-01	INSR	3643	NM_000208	1.08629	0.613886	0.850088
Plate 5	B06	M-005332-00	INSRR	3645	NM_014215	0.80032	0.231968	0.516144
Plate 5	B07	M-004760-02	IRAK1	3654	NM_001569	1.85474	3.08499	2.46986
Plate 5	B08	M-004761-00	IRAK2	3656	NM_001570	-0.201042	-0.0937641	-0.147403
Plate 5	B09	M-004762-00	IRAK3	11213	NM_007199	-1.17191	-1.42247	-1.29719
Plate 5	B10	M-003015-01	IRS1	3667	NM_005544	-0.0912715	0.0101108	-0.0405803
Plate 5	B11	M-003144-02	ITK	3702	NM_005546	0.447363	1.06456	0.755963
Plate 5	B12	M-006741-00	ITPK1	3705	NM_014216	-2.01243	-2.30561	-2.15902
Plate 5	C03	M-006742-01	ITPKA	3706	NM_002220	0.0272592	-0.324235	-0.148488
Plate 5	C04	M-006743-02	ITPKB	3707	NM_002221	0.420121	0.554096	0.487109
Plate 5	C05	M-006744-01	ITPKC	80271	NM_025194	-0.0906663	-0.156211	-0.123439
Plate 5	C06	M-003145-01	JAK1	3716	NM_002227	-0.431091	-0.48049	-0.45579
Plate 5	C07	M-003146-02	JAK2	3717	NM_004972	0.240283	0.35127	0.295776
Plate 5	C08	M-003147-01	JAK3	3718	NM_000215	-0.983791	-0.743324	-0.863557
Plate 5	C09	M-004844-01	JIK	51347	NM_016281	0.114788	-0.0937549	0.0105163
Plate 5	C10	M-003148-01	KDR	3791	NM_002253	-1.21916	-1.47406	-1.34661
Plate 5	C11	M-006745-02	KHK	3795	NM_000221	2.24063	2.60343	2.42203
Plate 5	C12	M-004542-02	TNIK	23043	XM_039796	0.662893	0.857926	0.76041
Plate 5	D03	M-004046-00	MAST3	23031	XM_038150	1.4852	0.738804	1.112
Plate 5	D04	M-004779-02	KIAA0999	23387	NM_025164	-0.110161	-0.493578	-0.301869
Plate 5	D05	M-004846-01	KIAA1361	57551	XM_290796	0.117304	-0.607911	-0.245304
Plate 5	D06	M-023172-01	KIAA1399	57574	XM_046685	0.472519	0.214314	0.343417
Plate 5	D07	M-005336-00	KIAA1639	57729	XM_290923	-1.30185	-1.42278	-1.36232
Plate 5	D08	M-005337-00	KIAA1765	85443	XM_047355	0.0619046	0.0235937	0.0427491
Plate 5	D09	M-004063-00	KIAA1804	84451	NM_032435	0.047372	0.348782	0.198077
Plate 5	D10	M-004619-01	KIAA1811	84446	NM_032430	-0.68113	-0.435812	-0.558471
Plate 5	D11	M-005338-01	LMTK3	114783	XM_055866	-1.81545	-1.19811	-1.50678
Plate 5	D12	M-004963-00	KIF13B	23303	NM_015254	-0.107929	-0.0190769	-0.063503
Plate 5	E03	M-003981-01	KIS	127933	NM_144624	-0.785605	-1.1307	-0.95815
Plate 5	E04	M-003150-01	KIT	3815	NM_000222	-0.656582	-0.507078	-0.58183
Plate 5	E05	M-003149-01	LMTK2	22853	NM_014916	-0.221623	0.0614678	-0.0800775
Plate 5	E06	M-005322-01	KSR2	283455	NM_173598	-0.758735	-0.808528	-0.783632
Plate 5	E07	M-005009-01	LAK	80216	NM_025144	-0.718748	-0.611776	-0.665262
Plate 5	E08	M-004632-00	LATS1	9113	NM_004690	-0.0496497	0.186217	0.0682836
Plate 5	E09	M-003865-00	LATS2	26524	NM_014572	0.745623	1.1866	0.966111
Plate 5	E10	M-003151-01	LCK	3932	NM_005356	-0.437745	-0.281529	-0.359637
Plate 5	E11	M-012120-00	LCP2	3937	NM_005565	-1.06927	-0.994445	-1.03186
Plate 5	E12	M-006930-00	LIM	10611	NM_006457	-0.595366	-0.607933	-0.601649
Plate 5	F03	M-007730-01	LIMK1	3984	NM_002314	-0.637871	-0.628181	-0.633026
Plate 5	F04	M-003311-02	LIMK2	3985	NM_005569	0.24754	0.224687	0.236114
Plate 5	F05	M-015901-01	LOC115704	115704	NM_145245	-0.353351	-0.14026	-0.246806
Plate 5	F06	M-005011-01	LOC149420	149420	NM_152835	-0.122776	0.111821	-0.00547757
Plate 5	F07	M-006804-00	PRPS1L1	221823	NM_175886	-1.17885	-0.922626	-1.05074
Plate 5	F08	M-005340-01	LOC340371	340371	NM_178564	0.338514	0.0780608	0.208287
Plate 5	F09	M-005342-02	LOC91807	91807	NM_182493	0.0752153	-0.120242	-0.0225134
Plate 5	F10	M-003152-01	LTK	4058	NM_002344	-0.813165	-0.525032	-0.669099
Plate 5	F11	M-005343-01	LYK5	92335	NM_153335	-1.62475	-2.03495	-1.82985
Plate 5	F12	M-003153-03	LYN	2534	NM_002350	0.489288	0.792398	0.640843
Plate 5	G03	M-020068-00	SMAD7	4092	NM_005904	0.703119	0.742373	0.722746
Plate 5	G04	M-009453-01	MAGI-3	260425	NM_020965	-0.536734	-0.54252	-0.539627
Plate 5	G05	M-004813-01	MAK	4117	NM_005906	-0.833596	-1.27128	-1.05244
Plate 5	G06	M-005936-01	MALT1	10892	NM_006785	1.40681	0.388644	0.897729
Plate 5	G07	M-003571-01	MAP2K1	5604	NM_002755	0.343759	0.537163	0.440461
Plate 5	G08	M-003572-02	MAP2K1IP1	8649	NM_021970	1.58039	1.44643	1.51341
Plate 5	G09	M-003573-03	MAP2K2	5605	NM_030662	1.63964	0.861033	1.25034
Plate 5	G10	M-003509-01	MAP2K3	5606	NM_002756	-1.73891	-1.89706	-1.81799
Plate 5	G11	M-003574-02	MAP2K4	6416	NM_003010	1.7575	2.47795	2.11772
Plate 5	G12	M-003966-03	MAP2K5	5607	NM_002757	0.270298	0.189853	0.230076
Plate 5	H03	M-003967-00	MAP2K6	5608	NM_002758	0.135715	0.366015	0.250865
Plate 5	H04	M-004016-01	MAP2K7	5609	NM_145185	-0.00475676	0.521843	0.258543
Plate 5	H05	M-003575-01	MAP3K1	4214	XM_042066	-0.278727	-0.321772	-0.30025
Plate 5	H06	M-003576-01	MAP3K10	4294	NM_002446	-2.30344	-1.92474	-2.11409
Plate 5	H07	M-003577-02	MAP3K11	4296	NM_002419	-1.63472	-0.667574	-1.15115
Plate 5	H08	M-003312-02	MAP3K12	7786	NM_006301	0.218623	0.755877	0.48725
Plate 5	H09	M-003579-01	MAP3K13	9175	NM_004721	0.383759	0.948309	0.666034
Plate 5	H10	M-003580-03	MAP3K14	9020	NM_003954	2.863	2.22849	2.54574
Plate 5	H11	M-003582-01	MAP3K2	10746	NM_006609	-0.344119	-0.400118	-0.372119
Plate 5	H12	M-003301-02	MAP3K3	4215	NM_002401	0.145527	0.269398	0.207463
Plate 6	A03	M-003789-02	MAP3K4	4216	NM_005922	1.37205	1.7092	1.54062
Plate 6	A04	M-003584-02	MAP3K5	4217	NM_005923	0.512471	0.363816	0.438144
Plate 6	A05	M-003969-00	MAP3K6	9064	NM_004672	0.0407222	0.1361	0.0884113
Plate 6	A06	M-003790-05	MAP3K7	6885	NM_003188	-0.662074	-0.87558	-0.768827
Plate 6	A07	M-003511-03	MAP3K8	1326	NM_005204	0.433775	0.0539655	0.24387
Plate 6	A08	M-003585-01	MAP3K9	4293	NM_033141	-1.23587	-1.04046	-1.13817
Plate 6	A09	M-003586-01	MAP4K1	11184	NM_007181	0.00697223	0.782092	0.394532
Plate 6	A10	M-003587-01	MAP4K2	5871	NM_004579	0.149805	0.407702	0.278754
Plate 6	A11	M-003588-01	MAP4K3	8491	NM_003618	-0.339003	-0.00265568	-0.170829
Plate 6	A12	M-003971-02	MAP4K4	9448	NM_004834	1.87187	0.807291	1.33958
Plate 6	B03	M-003589-02	MAP4K5	11183	NM_006575	-1.13257	-0.432212	-0.78239
Plate 6	B04	M-003555-02	MAPK1	5594	NM_002745	2.37928	1.95727	2.16827
Plate 6	B05	M-004324-00	MAPK10	5602	NM_002753	0.660361	0.443672	0.552016
Plate 6	B06	M-003972-03	MAPK11	5600	NM_002751	-0.637971	-1.03079	-0.834382
Plate 6	B07	M-003590-00	MAPK12	6300	NM_002969	0.813225	1.15016	0.981693
Plate 6	B08	M-003591-02	MAPK13	5603	NM_002754	0.0962858	0.254298	0.175292
Plate 6	B09	M-003512-05	MAPK14	1432	NM_001315	1.24168	0.943861	1.09277
Plate 6	B10	M-003592-02	MAPK3	5595	NM_002746	-0.198604	-0.122504	-0.160554
Plate 6	B11	M-003593-02	MAPK4	5596	NM_002747	-1.07392	-1.0525	-1.06321
Plate 6	B12	M-003594-01	MAPK6	5597	NM_002748	2.45262	2.00561	2.22911
Plate 6	C03	M-003513-02	MAPK7	5598	NM_002749	1.16686	1.6797	1.42328
Plate 6	C04	M-003514-01	MAPK8	5599	NM_002750	0.723417	0.92369	0.823554
Plate 6	C05	M-003595-00	MAPK8IP1	9479	NM_005456	0.271276	0.5796	0.425438
Plate 6	C06	M-012462-00	MAPK8IP2	23542	NM_012324	0.870547	1.15406	1.0123
Plate 6	C07	M-003596-01	MAPK8IP3	23162	NM_015133	1.45152	1.09048	1.271
Plate 6	C08	M-003505-02	MAPK9	5601	NM_002752	1.38246	0.955611	1.16903
Plate 6	C09	M-003516-02	MAPKAPK2	9261	NM_004759	-0.178731	0.700006	0.260637
Plate 6	C10	M-005014-01	MAPKAPK3	7867	NM_004635	-0.0826329	-0.115229	-0.0989308
Plate 6	C11	M-005015-00	MAPKAPK5	8550	NM_003668	1.11157	0.691129	0.901348
Plate 6	C12	M-004259-02	MARK1	4139	NM_018650	-0.999247	-0.911823	-0.955535
Plate 6	D03	M-004260-01	MARK2	2011	NM_004954	1.3864	0.972622	1.17951
Plate 6	D04	M-003517-03	MARK3	4140	NM_002376	0.745632	0.680148	0.71289
Plate 6	D05	M-005345-02	MARK4	57787	NM_031417	-1.15032	-0.992614	-1.07147
Plate 6	D06	M-004633-00	MAST2	23139	NM_015112	-0.546667	-1.03769	-0.792176
Plate 6	D07	M-003154-03	MATK	4145	NM_002378	-0.600721	-0.677366	-0.639043
Plate 6	D08	M-021396-00	MBIP	51562	NM_016586	0.0267655	-0.343062	-0.158148
Plate 6	D09	M-004029-01	MELK	9833	NM_014791	0.787585	0.176429	0.482007
Plate 6	D10	M-003155-01	MERTK	10461	NM_006343	-1.14678	-1.3951	-1.27094
Plate 6	D11	M-003156-02	MET	4233	NM_000245	-0.511697	-0.597402	-0.554549
Plate 6	D12	M-005346-00	MGC16169	93627	NM_033115	-0.625657	-0.263412	-0.444535
Plate 6	E03	M-004634-00	STK32A	202374	NM_145001	-0.350509	0.333722	-0.00839359
Plate 6	E04	M-004783-00	MGC26597	206426	NM_152700	-0.826359	-0.975089	-0.900724
Plate 6	E05	M-004681-01	CSNK1A1L	122011	NM_145203	-1.47435	-1.87583	-1.67509
Plate 6	E06	M-005016-01	MGC42105	167359	NM_153361	0.14189	0.385689	0.26379
Plate 6	E07	M-005347-00	C9ORF96	169436	XM_291304	1.08787	0.738029	0.912947
Plate 6	E08	M-005017-01	MGC45428	166614	NM_152619	0.711085	0.297456	0.50427
Plate 6	E09	M-008770-00	PIP5KL1	138429	NM_173492	0.918242	0.65605	0.787146
Plate 6	E10	M-005348-00	MGC4796	83931	NM_032017	-1.58277	-1.23811	-1.41044
Plate 6	E11	M-007684-01	MGC5601	80724	NM_025247	-2.60603	-2.37095	-2.48849
Plate 6	E12	M-005349-01	MGC8407	79012	NM_024046	-0.16448	0.141987	-0.0112465
Plate 6	F03	M-005350-01	MIDORI	57538	NM_020778	1.05468	1.84852	1.4516
Plate 6	F04	M-004861-02	MINK	50488	NM_015716	0.786675	0.865927	0.826301
Plate 6	F05	M-004879-01	MKNK1	8569	NM_003684	-0.0492435	-0.279369	-0.164306
Plate 6	F06	M-004908-01	MKNK2	2872	NM_017572	0.413062	-0.102959	0.155052
Plate 6	F07	M-003859-02	MOS	4342	NM_005372	-0.647687	-0.962642	-0.805164
Plate 6	F08	M-010252-00	MPP1	4354	NM_002436	0.864749	0.964944	0.914846
Plate 6	F09	M-009729-00	MPP2	4355	NM_005374	-1.29159	-0.514311	-0.902949
Plate 6	F10	M-010612-01	MPP3	4356	NM_001932	-0.768152	-0.013086	-0.390619
Plate 6	F11	M-015738-01	MPZL1	9019	NM_003953	-0.463917	-0.507368	-0.485642
Plate 6	F12	M-020064-00	MRC2	9902	NM_006039	-2.19649	-2.80332	-2.4999
Plate 6	G03	M-003157-02	MST1R	4486	NM_002447	-0.964229	-0.713652	-0.838941
Plate 6	G04	M-003753-01	MST4	51765	NM_016542	0.23583	0.187613	0.211721
Plate 6	G05	M-003158-01	MUSK	4593	NM_005592	0.274529	0.204111	0.23932
Plate 6	G06	M-006748-00	MVD	4597	NM_002461	0.451933	0.830953	0.641443
Plate 6	G07	M-006749-00	MVK	4598	NM_000431	0.313768	0.0184955	0.166132
Plate 6	G08	M-005351-04	MYLK	4638	NM_005965	0.146107	0.24961	0.197858
Plate 6	G09	M-005352-02	MYLK2	85366	NM_033118	-0.0298298	0.17735	0.0737602
Plate 6	G10	M-004862-00	MYO3A	53904	NM_017433	-0.905065	-0.475307	-0.690186
Plate 6	G11	M-004863-00	MYO3B	140469	NM_138995	0.635254	0.441375	0.538314
Plate 6	G12	M-006750-00	NAGK	55577	NM_017567	-1.38328	-1.45053	-1.4169
Plate 6	H03	M-015419-00	NBEA	26960	NM_015678	1.42282	1.56283	1.49282
Plate 6	H04	M-006751-00	COASY	80347	NM_025233	-0.728565	-1.14582	-0.93719
Plate 6	H05	M-004864-00	NEK1	4750	XM_291107	-0.0584443	0.583941	0.262748
Plate 6	H06	M-004865-01	NEK11	79858	NM_024800	-0.77202	-0.868933	-0.820477
Plate 6	H07	M-004090-03	NEK2	4751	NM_002497	-0.0703687	-0.266471	-0.16842
Plate 6	H08	M-004867-01	NEK3	4752	NM_002498	-1.06847	-1.95308	-1.51078
Plate 6	H09	M-003519-01	NEK4	6787	NM_003157	-0.422496	-0.37277	-0.397633
Plate 6	H10	M-004166-01	NEK6	10783	NM_014397	0.848166	0.674972	0.761569
Plate 6	H11	M-003795-02	NEK7	140609	NM_133494	-0.868084	-0.122261	-0.495172
Plate 6	H12	M-004866-00	NEK8	284086	NM_178170	-1.44692	-1.87983	-1.66337
Plate 7	A03	M-004869-01	NEK9	91754	NM_033116	0.551135	-0.273193	0.138971
Plate 7	A04	M-004763-01	NLK	51701	NM_016231	-0.570503	-0.715035	-0.642769
Plate 7	A05	M-006821-01	NME1	4830	NM_000269	-1.367	-1.29927	-1.33313
Plate 7	A06	M-005102-01	NME2	4831	NM_002512	-0.544881	-0.217046	-0.380964
Plate 7	A07	M-006753-00	NME3	4832	NM_002513	-1.87208	-1.24494	-1.55851
Plate 7	A08	M-006494-00	NME4	4833	NM_005009	2.89918	1.74248	2.32083
Plate 7	A09	M-006754-00	NME5	8382	NM_003551	0.128597	-0.138035	-0.00471916
Plate 7	A10	M-006755-01	NME6	10201	NM_005793	-0.483613	0.336465	-0.0735738
Plate 7	A11	M-006756-02	NME7	29922	NM_013330	-0.01096	-0.119659	-0.0653095
Plate 7	A12	M-005354-00	NPR1	4881	NM_000906	-0.646666	-1.074	-0.860334
Plate 7	B03	M-005355-01	NPR2	4882	NM_000907	-0.11677	0.261971	0.0726005
Plate 7	B04	M-005356-01	NRBP	29959	NM_013392	-0.376885	-0.78988	-0.583382
Plate 7	B05	M-026286-00	NRG3	10718	XM_166086	1.33428	0.576651	0.955464
Plate 7	B06	M-003159-01	NTRK1	4914	NM_002529	-1.24853	-1.00514	-1.12683
Plate 7	B07	M-003160-01	NTRK2	4915	NM_006180	1.33869	0.846242	1.09247
Plate 7	B08	M-003161-01	NTRK3	4916	NM_002530	0.0987434	-0.0221976	0.0382729
Plate 7	B09	M-007733-00	NYD-SP25	89882	NM_033516	0.134984	0.577911	0.356448
Plate 7	B10	M-004870-01	OSR1	9943	NM_005109	1.14685	0.986893	1.06687
Plate 7	B11	M-007734-01	P15RS	55197	NM_018170	-0.672804	-0.491343	-0.582073
Plate 7	B12	M-005357-00	PACE-1	57147	NM_020423	-0.310184	-0.437448	-0.373816
Plate 7	C03	M-007735-00	PACSIN1	29993	NM_020804	0.863746	1.10865	0.986196
Plate 7	C04	M-012956-01	PAG	55824	NM_018440	0.729029	0.54629	0.637659
Plate 7	C05	M-003521-03	PAK1	5058	NM_002576	-0.0740267	0.281672	0.103823
Plate 7	C06	M-003597-02	PAK2	5062	NM_002577	0.563597	0.621302	0.59245
Plate 7	C07	M-003614-00	PAK3	5063	NM_002578	-0.280432	-0.160943	-0.220688
Plate 7	C08	M-003615-02	PAK4	10298	NM_005884	-1.42171	-1.24383	-1.33277
Plate 7	C09	M-004338-02	PAK6	56924	NM_020168	1.41717	1.79055	1.60386
Plate 7	C10	M-003973-02	PAK7	57144	NM_020341	0.715052	0.709136	0.712094
Plate 7	C11	M-004057-02	PANK1	53354	NM_138316	0.622353	0.251043	0.436698
Plate 7	C12	M-006758-00	PANK3	79646	NM_024594	0.0721735	0.353916	0.213045
Plate 7	D03	M-006759-00	PANK4	55229	NM_018216	-0.18299	0.364683	0.0908464
Plate 7	D04	M-007736-01	PAPSS1	9061	NM_005443	0.481912	0.45132	0.466616
Plate 7	D05	M-006760-01	PAPSS2	9060	NM_004670	0.591222	0.329357	0.46029
Plate 7	D06	M-005018-01	PASK	23178	NM_015148	0.523866	0.37797	0.450918
Plate 7	D07	M-006796-00	PCK1	5105	NM_002591	-1.91849	-2.64618	-2.28233
Plate 7	D08	M-006797-01	PCK2	5106	NM_004563	0.846336	0.420622	0.633479
Plate 7	D09	M-004313-00	PCTK1	5127	NM_006201	-1.17673	-0.890006	-1.03337
Plate 7	D10	M-004835-01	PCTK2	5128	NM_002595	0.128137	0.349463	0.2388
Plate 7	D11	M-004836-02	PCTK3	5129	NM_002596	0.689439	0.614568	0.652004
Plate 7	D12	M-003162-03	PDGFRA	5156	NM_006206	0.0921088	0.558971	0.32554
Plate 7	E03	M-003163-02	PDGFRB	5159	NM_002609	-1.18935	-1.17607	-1.18271
Plate 7	E04	M-005019-00	PDK1	5163	NM_002610	0.282955	-0.113282	0.0848368
Plate 7	E05	M-005020-00	PDK2	5164	NM_002611	0.158408	-0.0523047	0.0530515
Plate 7	E06	M-005021-01	PDK3	5165	NM_005391	0.118262	0.126258	0.12226
Plate 7	E07	M-019425-00	PDK4	5166	NM_002612	-0.986057	-0.950647	-0.968352
Plate 7	E08	M-003017-01	PDPK1	5170	NM_002613	0.733377	1.25442	0.993898
Plate 7	E09	M-005070-02	PDXK	8566	NM_003681	0.364237	0.434894	0.399565
Plate 7	E10	M-006761-00	PFKFB1	5207	NM_002625	-0.434018	-0.00475235	-0.219385
Plate 7	E11	M-006762-01	PFKFB2	5208	NM_006212	-1.773	-1.42757	-1.60028
Plate 7	E12	M-006763-00	PFKFB3	5209	NM_004566	-1.09304	-1.02115	-1.05709
Plate 7	F03	M-006764-00	PFKFB4	5210	NM_004567	-0.555809	-0.390048	-0.472929
Plate 7	F04	M-006822-00	PFKL	5211	NM_002626	-0.363811	0.00850741	-0.177652
Plate 7	F05	M-006765-01	PFKM	5213	NM_000289	0.807587	0.240251	0.523919
Plate 7	F06	M-010253-01	PFKP	5214	NM_002627	-1.12381	-0.542925	-0.833365
Plate 7	F07	M-004837-01	PFTK1	5218	NM_012395	-0.521324	-0.385562	-0.453443
Plate 7	F08	M-006767-01	PGK1	5230	NM_000291	0.665404	0.691126	0.678265
Plate 7	F09	M-006768-01	PGK2	5232	NM_138733	0.337248	0.372347	0.354798
Plate 7	F10	M-019682-00	PHKA1	5255	NM_002637	1.5886	1.31681	1.4527
Plate 7	F11	M-007669-00	PHKA2	5256	NM_000292	1.22303	0.996003	1.10952
Plate 7	F12	M-005023-01	PHKG1	5260	NM_006213	0.767467	1.22362	0.995543
Plate 7	G03	M-004881-00	PHKG2	5261	NM_000294	0.482206	0.42767	0.454938
Plate 7	G04	M-006769-01	PI4K2B	55300	NM_018323	-1.54335	-1.57941	-1.56138
Plate 7	G05	M-006770-01	PI4KII	55361	NM_018425	0.0548768	-0.0623521	-0.00373762
Plate 7	G06	M-006771-00	PIK3C2A	5286	NM_002645	-1.32185	-1.96839	-1.64512
Plate 7	G07	M-006772-01	PIK3C2B	5287	NM_002646	0.960221	0.798838	0.87953
Plate 7	G08	M-006773-00	PIK3C2G	5288	NM_004570	-0.212494	-0.183506	-0.198
Plate 7	G09	M-003018-01	PIK3CA	5290	NM_006218	1.18713	1.74378	1.46546
Plate 7	G10	M-003019-02	PIK3CB	5291	NM_006219	0.749144	0.58725	0.668197
Plate 7	G11	M-005274-02	PIK3CG	5294	NM_002649	0.822444	1.09721	0.959826
Plate 7	G12	M-003020-02	PIK3R1	5295	NM_181504	-1.52149	-1.3811	-1.4513
Plate 7	H03	M-003021-01	PIK3R2	5296	NM_005027	-0.254735	-1.03322	-0.64398
Plate 7	H04	M-019546-00	PIK3R3	8503	NM_003629	-1.02683	-0.851916	-0.939372
Plate 7	H05	M-005025-01	PIK3R4	30849	NM_014602	-0.806644	-0.399257	-0.60295
Plate 7	H06	M-006776-03	PIK4CA	5297	NM_002650	-1.79777	-2.26178	-2.02977
Plate 7	H07	M-006777-02	PIK4CB	5298	NM_002651	1.47634	1.69258	1.58446
Plate 7	H08	M-003923-00	PIM1	5292	NM_002648	2.79069	3.27795	3.03432
Plate 7	H09	M-005359-00	PIM2	11040	NM_006875	-1.34362	-0.912438	-1.12803
Plate 7	H10	M-004030-01	PINK1	65018	NM_032409	-0.0174685	0.24086	0.111696
Plate 7	H11	M-004780-02	PIP5K1A	8394	NM_003557	-0.0714955	-0.338283	-0.204889
Plate 7	H12	M-006778-00	PIP5K2A	5305	NM_005028	-0.30502	-1.18441	-0.744714
Plate 8	A03	M-006779-02	PIP5K2B	8396	NM_003559	0.122814	-0.69928	-0.288233
Plate 8	A04	M-004535-00	PIP5K2C	79837	NM_024779	1.40995	0.0964692	0.753207
Plate 8	A05	M-014699-00	PITPNM3	83394	NM_031220	-1.06275	-1.44867	-1.25571
Plate 8	A06	M-004615-00	STK32C	282974	NM_173575	0.571038	0.928198	0.749618
Plate 8	A07	M-012321-00	PKIA	5569	NM_006823	0.432609	0.0932336	0.262921
Plate 8	A08	M-008224-01	PKIB	5570	NM_032471	0.360952	0.577951	0.469451
Plate 8	A09	M-006780-00	PKLR	5313	NM_000298	0.988303	0.281223	0.634763
Plate 8	A10	M-006781-01	PKM2	5315	NM_002654	-2.66389	-2.04175	-2.35282
Plate 8	A11	M-005026-02	PKMYT1	9088	NM_004203	-0.354206	-0.124047	-0.239126
Plate 8	A12	M-004647-00	PKN3	29941	NM_013355	-3.287	-3.72967	-3.50834
Plate 8	B03	M-003290-01	PLK1	5347	NM_005030	-1.83224	-0.330526	-2.4431
Plate 8	B04	M-010904-00	EXOSC10	5394	NM_002685	0.41667	0.61332	0.514995
Plate 8	B05	M-006782-00	PMVK	10654	NM_006556	-0.354888	-0.628802	-0.491845
Plate 8	B06	M-006783-02	PNKP	11284	NM_007254	-1.09645	-0.68263	-0.889542
Plate 8	B07	M-012745-00	PPP1R1B	84152	NM_032192	-0.168134	-0.609244	-0.388689
Plate 8	B08	M-003598-00	PPP2CA	5515	NM_002715	-0.234484	0.374655	0.0700856
Plate 8	B09	M-003599-02	PPP2CB	5516	NM_004156	1.37237	1.72048	1.54643
Plate 8	B10	M-008486-01	PPP4C	5531	NM_002720	0.220849	0.0772221	0.149035
Plate 8	B11	M-005027-01	PRKAA1	5562	NM_006251	1.31813	1.1365	1.22731
Plate 8	B12	M-005361-01	PRKAA2	5563	NM_006252	-1.46941	-1.28089	-1.37515
Plate 8	C03	M-004649-00	PRKACA	5566	NM_002730	0.256837	0.525704	0.39127
Plate 8	C04	M-004650-00	PRKACB	5567	NM_002731	-0.566785	-1.03032	-0.798554
Plate 8	C05	M-004651-02	PRKACG	5568	NM_002732	0.531323	0.383342	0.457332
Plate 8	C06	M-009056-00	PRKAG1	5571	NM_002733	-0.653671	-0.443821	-0.548746
Plate 8	C07	M-009859-01	PRKAG3	53632	NM_017431	0.415607	0.206353	0.31098
Plate 8	C08	M-007670-01	PRKAR1A	5573	NM_002734	1.29304	1.24845	1.27075
Plate 8	C09	M-007671-00	PRKAR2A	5576	NM_004157	-0.669152	-0.242958	-0.456055
Plate 8	C10	M-007673-00	PRKAR2B	5577	NM_002736	0.509635	0.163875	0.336755
Plate 8	C11	M-003523-03	PRKCA	5578	NM_002737	-0.268072	-1.06793	-0.668003
Plate 8	C12	M-020124-00	PRKCABP	9463	NM_012407	-0.364527	-0.426058	-0.395293
Plate 8	D03	M-003758-04	PRKCB1	5579	NM_002738	0.383228	-0.431779	-0.0242755
Plate 8	D04	M-003524-01	PRKCD	5580	NM_006254	-0.151042	-0.224764	-0.187903
Plate 8	D05	M-004653-00	PRKCE	5581	NM_005400	0.656331	0.577495	0.616913
Plate 8	D06	M-004654-01	PRKCG	5582	NM_002739	-0.298095	0.0336916	-0.132202
Plate 8	D07	M-004655-01	PRKCH	5583	NM_006255	-0.606675	-0.305345	-0.45601
Plate 8	D08	M-004656-01	PRKCI	5584	NM_002740	0.739952	0.831195	0.785573
Plate 8	D09	M-004175-02	PRKCL1	5585	NM_002741	1.31112	1.39864	1.35488
Plate 8	D10	M-004612-02	PRKCL2	5586	NM_006256	0.244981	0.904275	0.574628
Plate 8	D11	M-005028-00	PRKCM	5587	NM_002742	-0.24187	-0.136952	-0.189411
Plate 8	D12	M-005029-01	PRKCN	23683	NM_005813	-0.46948	-0.533739	-0.501609
Plate 8	E03	M-003525-01	PRKCQ	5588	NM_006257	-0.564713	-0.315989	-0.440351
Plate 8	E04	M-010618-00	PRKCSH	5589	NM_002743	-0.185684	-0.286833	-0.236258
Plate 8	E05	M-003526-02	PRKCZ	5590	NM_002744	0.381824	1.19714	0.789483
Plate 8	E06	M-004197-01	PRKD2	25865	NM_016457	-0.824967	-0.726433	-0.7757
Plate 8	E07	M-005030-01	PRKDC	5591	NM_006904	-0.709946	-0.615723	-0.662834
Plate 8	E08	M-004658-02	PRKG1	5592	NM_006258	0.465669	0.241657	0.353663
Plate 8	E09	M-004659-00	PRKG2	5593	NM_006259	0.960465	0.589438	0.774952
Plate 8	E10	M-003527-00	PRKR	5610	NM_002759	1.03412	1.1916	1.11286
Plate 8	E11	M-006426-00	PRKRA	8575	NM_003690	0.184612	0.683774	0.434193
Plate 8	E12	M-005362-00	PRKWNK1	65125	NM_018979	-1.53295	-1.88644	-1.7097
Plate 8	F03	M-005363-01	PRKWNK2	65268	NM_006648	0.38222	0.206897	0.294558
Plate 8	F04	M-005364-02	PRKWNK3	65267	NM_020922	-0.0403894	0.315122	0.137366
Plate 8	F05	M-005031-01	PRKWNK4	65266	NM_032387	0.945342	1.38287	1.16411
Plate 8	F06	M-004660-01	PRKX	5613	NM_005044	1.46507	1.3719	1.41849
Plate 8	F07	M-004661-02	PRKY	5616	NM_002760	-0.908022	-1.26992	-1.08897
Plate 8	F08	M-004074-03	PRPF4B	8899	NM_003913	-0.0861415	0.0039509	-0.0410953
Plate 8	F09	M-006784-00	PRPS1	5631	NM_002764	0.618465	0.863047	0.740756
Plate 8	F10	M-004877-01	PRPS2	5634	NM_002765	0.18983	0.0526315	0.121231
Plate 8	F11	M-006794-01	PRPSAP1	5635	NM_002766	-0.581539	-0.48662	-0.534079
Plate 8	F12	M-006795-01	PRPSAP2	5636	NM_002767	-1.57956	-1.59621	-1.58789
Plate 8	G03	M-004171-03	TAO1	9344	NM_004783	0.457633	0.428123	-0.0197624
Plate 8	G04	M-005365-00	PSKH1	5681	NM_006742	-0.158364	0.0762595	-0.0410524
Plate 8	G05	M-005366-00	PSKH2	85481	NM_033126	0.80748	0.693996	0.750738
Plate 8	G06	M-003164-02	PTK2	5747	NM_005607	-0.949279	-0.897435	-0.923357
Plate 8	G07	M-003165-03	PTK2B	2185	NM_004103	0.0654163	-0.146121	-0.0403522
Plate 8	G08	M-003166-01	PTK6	5753	NM_005975	-0.639994	-0.440135	-0.540065
Plate 8	G09	M-003167-02	PTK7	5754	NM_002821	0.291776	0.392253	0.342015
Plate 8	G10	M-003168-03	PTK9	5756	NM_002822	0.529259	0.651749	0.590504
Plate 8	G11	M-003169-01	PTK9L	11344	NM_007284	-0.626576	0.0294979	-0.298539
Plate 8	G12	M-003600-01	PTPN5	84867	NM_032781	0.765729	1.36485	1.06529
Plate 8	H03	M-008069-00	PTPRG	5793	NM_002841	0.437886	0.338199	0.388042
Plate 8	H04	M-008476-01	PTPRJ	5795	NM_002843	-1.47215	-1.6924	-1.58228
Plate 8	H05	M-004017-01	PTPRR	5801	NM_002849	-0.180824	0.485281	0.152228
Plate 8	H06	M-008072-01	PTPRT	11122	NM_007050	0.365469	0.582594	0.474032
Plate 8	H07	M-005367-00	PXK	54899	NM_017771	-0.408863	-0.374355	-0.391609
Plate 8	H08	M-006785-00	PYCS	5832	NM_002860	1.18562	0.253647	0.719632
Plate 8	H09	M-003560-02	RAC1	5879	NM_018890	0.0548434	-0.738148	-0.341653
Plate 8	H10	M-003601-00	RAF1	5894	NM_002880	3.74389	3.56813	3.65601
Plate 8	H11	M-004838-01	RAGE	5891	NM_014226	0.811134	-0.0118622	0.399636
Plate 8	H12	M-024516-01	RASGRF2	5924	NM_006909	-1.43669	-1.2331	-1.3349
Plate 9	A03	M-006786-00	RBKS	64080	NM_022128	-0.483043	-0.28906	-0.386051
Plate 9	A04	M-003170-01	RET	5979	NM_000323	2.87456	2.43284	2.6537
Plate 9	A05	M-006552-00	RFP	5987	NM_006510	0.765658	0.69699	0.731324
Plate 9	A06	M-004662-00	GRK1	6011	NM_002929	-0.556774	-0.594541	-0.575658
Plate 9	A07	M-005368-01	RIOK1	83732	NM_031480	-0.944525	-1.27688	-1.1107
Plate 9	A08	M-005040-01	RIOK3	8780	NM_003831	1.16345	0.873232	1.01834
Plate 9	A09	M-004445-01	RIPK1	8737	NM_003804	1.00015	0.337074	0.66861
Plate 9	A10	M-003602-00	RIPK2	8767	NM_003821	0.475129	0.72588	0.600504
Plate 9	A11	M-003534-00	RIPK3	11035	NM_006871	-0.415335	-0.282334	-0.348834
Plate 9	A12	M-005032-01	RNASEL	6041	NM_021133	-0.579714	-0.379285	-0.4795
Plate 9	B03	M-003536-01	ROCK1	6093	NM_005406	0.405821	0.663733	0.534777
Plate 9	B04	M-004610-01	ROCK2	9475	NM_004850	-0.604337	-0.925623	-0.76498
Plate 9	B05	M-003171-01	ROR1	4919	NM_005012	1.60572	1.19097	1.39834
Plate 9	B06	M-003172-01	ROR2	4920	NM_004560	2.49666	1.52664	2.01165
Plate 9	B07	M-003173-01	ROS1	6098	NM_002944	-0.779379	-1.10027	-0.939824
Plate 9	B08	M-012350-01	RP2	6102	NM_006915	-0.395656	0.0579713	-0.168842
Plate 9	B09	M-003025-03	RPS6KA1	6195	NM_002953	-1.27199	-0.937641	-1.10481
Plate 9	B10	M-004663-01	RPS6KA2	6196	NM_021135	-1.45955	-1.39341	-1.42648
Plate 9	B11	M-003026-01	RPS6KA3	6197	NM_004586	0.0183951	-0.0170359	0.000679627
Plate 9	B12	M-004664-00	RPS6KA4	8986	NM_003942	-1.02857	-1.12228	-1.07542
Plate 9	C03	M-004665-01	RPS6KA5	9252	NM_004755	-0.911991	-0.669089	-0.79054
Plate 9	C04	M-004670-00	RPS6KA6	27330	NM_014496	-0.152047	-0.0308223	-0.0914348
Plate 9	C05	M-003616-02	RPS6KB1	6198	NM_003161	0.0366453	-0.0847812	-0.0240679
Plate 9	C06	M-004671-00	RPS6KB2	6199	NM_003952	0.943804	1.18082	1.06231
Plate 9	C07	M-005371-01	RPS6KC1	26750	NM_012424	0.725875	0.761749	0.743812
Plate 9	C08	M-005372-00	RPS6KL1	83694	NM_031464	-0.322735	-0.750924	-0.536829
Plate 9	C09	M-003174-02	RYK	6259	NM_002958	0.289466	0.307526	0.298496
Plate 9	C10	M-004672-01	SAST	22983	NM_014975	-0.80347	-1.39935	-1.10141
Plate 9	C11	M-011505-01	SCAP1	8631	NM_003726	-0.327999	-0.193435	-0.260717
Plate 9	C12	M-005373-00	SCYL1	57410	NM_020680	0.116876	0.357929	0.237403
Plate 9	D03	M-007737-00	SEPHS1	22929	NM_012247	0.222925	-0.284382	-0.0307288
Plate 9	D04	M-003027-04	SGK	6446	NM_005627	0.959644	0.93228	0.945962
Plate 9	D05	M-004673-01	SGK2	10110	NM_016276	-0.8862	-0.582942	-0.734571
Plate 9	D06	M-004162-00	SGKL	23678	NM_013257	-1.51642	-1.40375	-1.46009
Plate 9	D07	M-018841-00	SHC1	6464	NM_003029	-1.14626	-1.01894	-1.0826
Plate 9	D08	M-004778-02	SIK2	23235	NM_015191	0.703022	0.957022	0.830022
Plate 9	D09	M-003850-02	SLK	9748	NM_014720	0.671641	1.22953	0.950586
Plate 9	D10	M-005033-00	SMG1	23049	NM_014006	-0.372236	-0.829853	-0.601044
Plate 9	D11	M-005374-01	SNARK	81788	NM_030952	0.41711	0.185825	0.301467
Plate 9	D12	M-003959-04	SNF1LK	150094	NM_173354	0.578384	0.921903	0.750143
Plate 9	E03	M-003325-03	PLK2	10769	NM_006622	-0.118673	0.0160224	-0.0513253
Plate 9	E04	M-004322-00	SNRK	54861	NM_017719	-0.768079	-0.512427	-0.640253
Plate 9	E05	M-011511-01	SOCS1	8651	NM_003745	0.516986	0.356519	0.436753
Plate 9	E06	M-017374-00	SOCS5	9655	NM_014011	-0.942861	-0.621965	-0.782413
Plate 9	E07	M-007677-01	SPA17	53340	NM_017425	-0.924119	-1.01703	-0.970573
Plate 9	E08	M-020826-00	SPEC2	56990	NM_020240	0.487618	0.265573	0.376596
Plate 9	E09	M-004172-02	SPHK1	8877	NM_021972	-0.26722	-0.298424	-0.282822
Plate 9	E10	M-004831-00	SPHK2	56848	NM_020126	-0.918428	-0.98301	-0.950719
Plate 9	E11	M-007738-00	SEPHS2	22928	NM_012248	-0.0944386	-0.200213	-0.147326
Plate 9	E12	M-010230-00	SQSTM1	8878	NM_003900	-2.33914	-2.502	-2.42057
Plate 9	F03	M-003175-03	SRC	6714	NM_005417	0.521628	-0.374235	0.0736964
Plate 9	F04	M-005376-00	SRMS	6725	NM_080823	-0.213566	-0.794879	-0.504223
Plate 9	F05	M-003982-02	SRPK1	6732	NM_003137	0.719061	0.48964	0.60435
Plate 9	F06	M-004839-01	SRPK2	6733	NM_182691	-0.0849208	0.00383701	-0.0405419
Plate 9	F07	M-007290-00	ABI1	10006	NM_005470	0.767377	0.244689	0.506033
Plate 9	F08	M-005034-00	SSTK	83983	NM_032037	0.0774872	0.410554	0.24402
Plate 9	F09	M-004168-01	STK10	6793	NM_005990	0.403499	1.05498	0.72924
Plate 9	F10	M-005035-01	STK11	6794	NM_000455	0.449034	0.0643756	0.256705
Plate 9	F11	M-004054-00	STK16	8576	NM_003691	-0.992836	-1.18445	-1.08864
Plate 9	F12	M-005377-00	STK17A	9263	NM_004760	-0.182994	-0.069707	-0.12635
Plate 9	G03	M-004051-01	STK17B	9262	NM_004226	-0.178793	-0.0733842	-0.126089
Plate 9	G04	M-005036-01	PLK4	10733	NM_014264	-0.751845	-0.758419	-0.755132
Plate 9	G05	M-005378-00	STK19	8859	NM_004197	-0.208444	0.0924456	-0.0579991
Plate 9	G06	M-005379-01	STK22B	23617	NM_053006	-0.225517	0.0255038	-0.100007
Plate 9	G07	M-004050-01	STK22C	81629	NM_052841	-0.533881	-0.998428	-0.766154
Plate 9	G08	M-005038-02	STK22D	83942	NM_032028	-0.298025	-0.442062	-0.370043
Plate 9	G09	M-004840-02	STK23	26576	NM_014370	1.28676	1.54647	1.41662
Plate 9	G10	M-004872-02	STK24	8428	NM_003576	0.136603	-0.309394	-0.0863953
Plate 9	G11	M-004873-00	STK25	10494	NM_006374	0.868774	1.61265	1.24071
Plate 9	G12	M-005381-02	STK29	9024	NM_003957	-0.0232442	0.161485	0.0691202
Plate 9	H03	M-004874-01	STK3	6788	NM_006281	0.986563	1.31227	1.14942
Plate 9	H04	M-005382-00	STK31	56164	NM_031414	0.285576	0.149146	0.217361
Plate 9	H05	M-005383-02	STK33	65975	NM_030906	-0.381637	0.187526	-0.0970554
Plate 9	H06	M-005384-00	STK35	140901	NM_080836	0.456845	0.465199	0.461022
Plate 9	H07	M-005039-01	STK36	27148	NM_015690	0.609359	0.893171	0.751265
Plate 9	H08	M-004674-00	STK38	11329	NM_007271	1.19731	0.85881	1.02806
Plate 9	H09	M-003313-02	STK38L	23012	NM_015000	2.24684	3.10027	2.67355
Plate 9	H10	M-004875-01	STK39	27347	NM_013233	-0.993228	-0.990397	-0.991813
Plate 9	H11	M-004157-01	STK4	6789	NM_006282	1.55713	1.8221	1.68961
Plate 9	H12	M-003545-09	STK6	6790	NM_003600	-3.64526	-2.77609	-3.21067
Plate 10	A03	M-003176-03	SYK	6850	NM_003177	-1.86273	-1.97985	-1.92129
Plate 10	A04	M-005041-01	TAF1	6872	NM_004606	0.177139	-0.445613	-0.134237
Plate 10	A05	M-005385-02	TAF1L	138474	NM_153809	0.580397	0.450609	0.515503
Plate 10	A06	M-004171-03	TAO1	9344	NM_004783	-0.479239	-0.485566	-0.0197624
Plate 10	A07	M-003788-02	TBK1	29110	NM_013254	-1.19015	-1.42403	-1.30709
Plate 10	A08	M-003177-02	TEC	7006	NM_003215	2.12886	1.54572	1.83729
Plate 10	A09	M-003178-02	TEK	7010	NM_000459	1.95496	1.11803	1.5365
Plate 10	A10	M-005043-00	TESK1	7016	NM_006285	0.400899	-0.201785	0.0995569
Plate 10	A11	M-005044-00	TESK2	10420	NM_007170	-1.53253	-1.76682	-1.64967
Plate 10	A12	M-005386-01	TEX14	56155	NM_031272	-2.21976	-2.57737	-2.39856
Plate 10	B03	M-003929-01	TGFBR1	7046	NM_004612	-0.275175	-0.29057	-0.282872
Plate 10	B04	M-003930-01	TGFBR2	7048	NM_003242	0.975927	0.417485	0.696706
Plate 10	B05	M-003179-01	TIE	7075	NM_005424	-1.83938	-1.53348	-1.68643
Plate 10	B06	M-009932-01	TJP2	9414	NM_004817	-0.705307	-0.380341	-0.542824
Plate 10	B07	M-006787-00	TK1	7083	NM_003258	-1.21397	-0.875688	-1.04483
Plate 10	B08	M-006788-02	TK2	7084	NM_004614	2.55848	1.4297	1.99409
Plate 10	B09	M-004174-00	TLK1	9874	NM_012290	0.780461	0.300057	0.540259
Plate 10	B10	M-005389-02	TLK2	11011	NM_006852	0.192612	0.105046	0.148829
Plate 10	B11	M-008086-00	TLR1	7096	NM_003263	0.0193296	-0.242418	-0.111544
Plate 10	B12	M-007745-00	TLR3	7098	NM_003265	0.0806896	-0.364272	-0.141791
Plate 10	C03	M-008088-00	TLR4	7099	NM_003266	0.48891	0.0966071	0.292759
Plate 10	C04	M-005156-01	TLR6	10333	NM_006068	-0.368791	0.00772934	-0.180531
Plate 10	C05	M-008090-01	TNFRSF10A	8797	NM_003844	0.611148	1.10213	0.856637
Plate 10	C06	M-003180-02	TNK1	8711	NM_003985	-0.276123	0.556551	0.140214
Plate 10	C07	M-005390-00	TOPK	55872	NM_018492	0.366072	0.176134	0.271103
Plate 10	C08	M-006789-00	TPK1	27010	NM_022445	1.03232	2.50114	1.76673
Plate 10	C09	M-005045-00	KALRN	11139	NM_007064	0.215278	-0.0387534	0.0882623
Plate 10	C10	M-005391-01	TRIB2	28951	NM_021643	-0.713488	-0.939789	-0.826638
Plate 10	C11	M-020821-00	TRIM	50852	NM_016388	-0.392114	-0.192495	-0.292304
Plate 10	C12	M-005047-00	TRIO	7204	NM_007118	-0.221485	-0.710816	-0.46615
Plate 10	D03	M-005048-01	TRPM6	140803	NM_017662	0.0580678	0.286233	0.17215
Plate 10	D04	M-005393-02	TRPM7	54822	NM_017672	1.17677	1.05207	1.11442
Plate 10	D05	M-013077-01	TSKS	60385	NM_021733	-0.21681	0.876165	0.329677
Plate 10	D06	M-004680-01	TTBK1	84630	XM_166453	-0.434243	-0.0408743	-0.237558
Plate 10	D07	M-004682-00	TTBK2	146057	NM_173500	-1.59502	-1.09443	-1.34472
Plate 10	D08	M-004105-00	TTK	7272	NM_003318	0.0426987	0.210056	0.126377
Plate 10	D09	M-005395-00	TTN	7273	NM_003319	0.789954	0.661581	0.725768
Plate 10	D10	M-003181-01	TXK	7294	NM_003328	0.882286	0.414436	0.648361
Plate 10	D11	M-006791-00	TXNDC3	51314	NM_016616	-0.495297	-0.563136	-0.529216
Plate 10	D12	M-003182-01	TYK2	7297	NM_003331	0.59434	0.0855033	0.339922
Plate 10	E03	M-003183-02	TYRO3	7301	NM_006293	0.391322	0.40672	0.399021
Plate 10	E04	M-004062-01	UCK1	83549	NM_031432	0.37154	0.9613	0.66642
Plate 10	E05	M-007739-02	UGP2	7360	NM_006759	0.180008	0.831044	0.505526
Plate 10	E06	M-005049-00	ULK1	8408	NM_003565	-0.193502	1.36274	0.58462
Plate 10	E07	M-005396-01	ULK2	9706	NM_014683	-0.00404271	0.225377	0.110667
Plate 10	E08	M-004059-00	UMP-CMPK	51727	NM_016308	-0.874296	-0.534686	-0.704491
Plate 10	E09	M-005077-00	UMPK	7371	NM_012474	0.524758	0.123391	0.324074
Plate 10	E10	M-006792-00	URKL1	54963	NM_017859	1.82234	1.4139	1.61812
Plate 10	E11	M-004683-01	VRK1	7443	NM_003384	-1.11388	-1.1871	-1.15049
Plate 10	E12	M-004684-01	VRK2	7444	NM_006296	-0.611729	-0.75307	-0.6824
Plate 10	F03	M-005397-01	VRK3	51231	NM_016440	0.62995	0.283091	0.456521
Plate 10	F04	M-005050-00	WEE1	7465	NM_003390	-2.1948	-2.49115	-2.336
Plate 10	F05	M-012386-00	WIF1	11197	NM_007191	-0.566515	-0.124455	-0.345485
Plate 10	F06	M-006793-00	XYLB	9942	NM_005108	0.510567	1.5155	1.01303
Plate 10	F07	M-003184-02	YES1	7525	NM_005433	0.655268	-0.177688	0.23879
Plate 10	F08	M-010626-00	YWHAH	7533	NM_003405	0.365417	0.525687	0.445552
Plate 10	F09	M-012329-00	YWHAQ	10971	NM_006826	0.456979	0.387276	0.422127
Plate 10	F10	M-005068-00	ZAK	51776	NM_133646	-0.985961	-0.931044	-0.958502
Plate 10	F11	M-005398-03	ZAP70	7535	NM_001079	0.560582	0.918285	0.739433
Plate 11	A03	M-003204-01	CCNA1	8900	NM_003914	0.80051	0.68775	0.74413
Plate 11	A04	M-003205-02	CCNA2	890	NM_001237	-0.71104	-0.129434	-0.420237
Plate 11	A05	M-003206-01	CCNB1	891	NM_031966	1.49474	1.41113	1.45293
Plate 11	A06	M-003207-01	CCNB2	9133	NM_004701	1.31389	2.35522	1.83455
Plate 11	A07	M-003208-02	CCNB3	85417	NM_033031	1.06338	0.738039	0.900711
Plate 11	A08	M-003209-01	CCNC	892	NM_005190	0.97483	0.917894	0.946362
Plate 11	A09	M-003210-02	CCND1	595	NM_053056	-0.42327	-0.557149	-0.490209
Plate 11	A10	M-003211-02	CCND2	894	NM_001759	-1.40219	-1.2336	-1.3179
Plate 11	A11	M-003212-02	CCND3	896	NM_001760	0.630163	0.665	0.647581
Plate 11	A12	M-003213-02	CCNE1	898	NM_001238	-0.0808791	-0.0317197	-0.0562994
Plate 11	B03	M-003214-01	CCNE2	9134	NM_004702	0.68234	0.801733	0.742036
Plate 11	B04	M-003215-01	CCNF	899	NM_001761	-0.794246	-0.115515	-0.45488
Plate 11	B05	M-003216-01	CCNG1	900	NM_004060	2.15362	2.33119	2.24241
Plate 11	B06	M-003217-02	CCNG2	901	NM_004354	0.527162	1.15782	0.84249
Plate 11	B07	M-003218-01	CCNH	902	NM_001239	0.913741	0.0318543	0.472798
Plate 11	B08	M-003219-02	CCNI	10983	NM_006835	0.311042	-0.293396	0.00882313
Plate 11	B09	M-003220-02	CCNT1	904	NM_001240	-1.00357	-0.645015	-0.824292
Plate 11	B10	M-003223-02	CDC16	8881	NM_003903	-0.0494252	-0.258884	-0.154155
Plate 11	B11	M-003224-03	CDC2	983	NM_001786	-0.660963	-0.505018	0.168556
Plate 11	B12	M-003225-03	CDC20	991	NM_001255	-2.63855	-2.17184	-2.4052
Plate 11	C03	M-003226-02	CDC25A	993	NM_001789	-0.360467	0.0842133	-0.138127
Plate 11	C04	M-003227-02	CDC25B	994	NM_004358	-1.31554	-1.05391	-1.18472
Plate 11	C05	M-003228-01	CDC25C	995	NM_001790	-0.320898	0.166764	-0.077067
Plate 11	C06	M-003229-03	CDC27	996	NM_001256	-1.07931	-0.506885	-0.793097
Plate 11	C07	M-003230-01	CDC34	997	NM_004359	-0.44667	0.252913	-0.0968784
Plate 11	C08	M-003231-01	CDC37	11140	NM_007065	-0.449612	-1.10612	-0.777864
Plate 11	C09	M-003232-02	CDC45L	8318	NM_003504	-0.0859748	0.509433	0.211729
Plate 11	C10	M-003233-02	CDC6	990	NM_001254	-0.736264	-0.448315	-0.59229
Plate 11	C11	M-003234-02	CDC7	8317	NM_003503	0.200436	0.0968372	-0.0349567
Plate 11	C12	M-003235-04	CDK10	8558	NM_003674	-0.866799	-0.499467	-0.210502
Plate 11	D03	M-003236-04	CDK2	1017	NM_001798	0.0435063	0.0463687	0.0149925
Plate 11	D04	M-003237-01	CDK3	1018	NM_001258	0.619124	0.276359	0.577524
Plate 11	D05	M-003238-02	CDK4	1019	NM_000075	-0.454894	-0.862453	-0.0205033
Plate 11	D06	M-003239-01	CDK5	1020	NM_004935	-0.902237	-0.472733	-0.791995
Plate 11	D07	M-003240-02	CDK6	1021	NM_001259	-0.660568	-1.14566	-0.5331
Plate 11	D08	M-003241-01	CDK7	1022	NM_001799	0.753095	0.512258	0.47962
Plate 11	D09	M-003242-02	CDK8	1024	NM_001260	0.407668	0.776692	0.366434
Plate 11	D10	M-003243-02	CDK9	1025	NM_001261	-0.398453	-0.318389	-0.318093
Plate 11	D11	M-003244-03	CDKN1C	1028	NM_000076	0.065435	0.730092	1.1
Plate 11	D12	M-003246-01	CDKN2C	1031	NM_001262	-0.711226	-0.52889	-0.614231
Plate 11	E03	M-003247-02	CDKN2D	1032	NM_001800	-0.642237	-0.668847	-1.03723
Plate 11	E04	M-003248-01	CDT1	81620	NM_030928	-0.050931	-0.148515	-0.0997228
Plate 11	E05	M-003249-02	CENPA	1058	NM_001809	0.839963	0.78762	0.813792
Plate 11	E06	M-003250-02	CENPB	1059	NM_001810	-0.0800644	-0.763792	-0.421928
Plate 11	E07	M-003251-02	CENPC1	1060	NM_001812	-0.29628	-0.0191394	-0.15771
Plate 11	E08	M-003252-01	CENPE	1062	NM_001813	-2.68083	-2.75262	-2.71673
Plate 11	E09	M-003255-02	CHEK1	1111	NM_001274	-0.830714	-0.195739	-1.5219
Plate 11	E10	M-003257-02	PLK3	1263	NM_004073	0.593458	0.916777	0.808475
Plate 11	E11	M-003259-01	E2F1	1869	NM_005225	-0.533408	-0.441918	-0.487663
Plate 11	E12	M-003260-02	E2F2	1870	NM_004091	0.73381	0.618286	0.676048
Plate 11	F03	M-003261-02	E2F3	1871	NM_001949	0.628145	0.248102	0.438123
Plate 11	F04	M-003273-01	MCM2	4171	NM_004526	0.823614	0.428424	0.626019
Plate 11	F05	M-003274-02	MCM3	4172	NM_002388	-0.120009	-0.326185	-0.223097
Plate 11	F06	M-003275-01	MCM4	4173	NM_005914	-0.426506	-0.140785	-0.283645
Plate 11	F07	M-003279-02	MDM2	4193	NM_002392	-0.409171	-0.279326	-0.344248
Plate 11	F08	M-003281-04	MNAT1	4331	NM_002431	-0.486924	-0.814572	-0.650748
Plate 11	F09	M-003283-01	ORC1L	4998	NM_004153	-1.73698	-2.5726	-2.15479
Plate 11	F10	M-003284-01	ORC2L	4999	NM_006190	1.24052	1.45033	1.34542
Plate 11	F11	M-003285-01	ORC3L	23595	NM_012381	1.11491	0.81444	0.964677
Plate 11	F12	M-003286-02	ORC4L	5000	NM_002552	2.45451	1.60669	2.0306
Plate 11	G03	M-003287-01	ORC5L	5001	NM_002553	0.468241	0.449494	0.458868
Plate 11	G04	M-003288-01	ORC6L	23594	NM_014321	0.629608	0.610469	0.620038
Plate 11	G05	M-003289-02	PCNA	5111	NM_002592	1.07233	1.64563	1.35898
Plate 11	G06	M-003290-01	PLK1	5347	NM_005030	-3.16026	-3.22826	-2.4431
Plate 11	G07	M-003293-01	RAD1	5810	NM_002853	-0.0712458	0.136513	0.0326335
Plate 11	G08	M-003294-01	RAD17	5884	NM_002873	0.583325	0.313532	0.448429
Plate 11	G09	M-003295-03	RAD9A	5883	NM_004584	0.661314	0.500416	0.580865
Plate 11	G10	M-003296-02	RB1	5925	NM_000321	-0.351817	0.0487904	-0.151513
Plate 11	G11	M-003297-01	JARID1A	5927	NM_005056	0.31103	0.0983581	0.204694
Plate 11	G12	M-003298-02	RBL1	5933	NM_002895	1.10911	-0.147927	0.480592
Plate 11	H03	M-003299-02	RBL2	5934	NM_005611	1.06359	0.753467	0.908528
Plate 11	H04	M-003300-01	RBP1	5947	NM_002899	-0.643874	-0.936454	-0.790164
Plate 11	H05	M-003322-01	RPA3	6119	NM_002947	-0.253879	-0.142347	-0.198113
Plate 11	H06	M-003323-02	SKP1A	6500	NM_006930	1.8045	1.96065	1.88258
Plate 11	H07	M-003324-03	SKP2	6502	NM_005983	1.00077	0.576247	0.78851
Plate 11	H08	M-003329-01	TP53	7157	NM_000546	-1.27943	-1.72911	-1.50427
Plate 11	H09	M-003331-01	TP73	7161	NM_005427	0.509531	0.181943	0.345737
Plate 11	H10	M-003330-01	TP73L	8626	NM_003722	0.42447	0.115587	0.270028
Plate 11	H11	M-003221-04	CCNT2	905	NM_058241	-0.123762	-0.191489	-0.157625
Plate 11	H12	M-003245-02	CDKN2B	1030	NM_004936	-0.290076	-0.427313	-0.0924168
